# Supplementary material for: Metacarpal torsion in apes, humans, and early Australopithecus: implications for manipulatory abilities
Source: PeerJ. 2015 Oct 6;3:e1311. doi: 10.7717/peerj.1311 (PMC4614803; doi:10.7717/peerj.1311)
Supplement: Supplemental Information 1 [file peerj-03-1311-s001.xls]

## Sheet: Data dg
cat	Musée	Notes	No musee	tax	sex	gen	gen2	sps	sexn	FemHSI R	FemHSI L	mc1d	mc1dRev	mc1g	mc2d	mc2dRev	mc2g	mc3d	mc3dRev	mc3g	mc4d	mc4dRev	mc4g	mc5d	mc5dRev	mc5g
Hssi030	CMC		XV-A:18	Hss	i	Hom	1	sap		41.51	42.48				14.2086	-14.2086		31.7501	-31.7501		-6.45354	6.45354		-13.3789	13.3789
Hssi031	CMC		XV-A:21	Hss	i	Hom	1	sap		45.34	44.95			-11.6111			-9.79343			-11.031			-0.0619425			16.7887
Hssi033	CMC		XV-A:52	Hss	i	Hom	1	sap		42.43	42.8			13.2893			-11.8667						9.06709			8.87359
Hssi034	CMC		XV-A:70	Hss	i	Hom	1	sap			47.24	2.80661	-2.80661					31.1371	-31.1371	-16.9482	-0.980276	0.980276		-11.8661	11.8661	12.8494
Hssm035	CMC		XV-A:96	Hss	m	Hom	1	sap	1	49.64	49.46	0.67581	-0.67581	-4.30505	9.95319	-9.95319	-7.97606	17.5848	-17.5848	-22.6043	-4.80358	4.80358	12.49
Hssm036				Hss	m	Hom	1	sap	1			-12.4543	12.4543	12.401	18.9811	-18.9811		29.0499	-29.0499	-19.9378	-4.60537	4.60537	14.6895	-10.6211	10.6211	12.3968
Hssf037	CMC		XVII-B:168	Hss	f	Hom	1	sap	0	44.9				5.87257	16.241	-16.241	-21.386	38.4183	-38.4183	-33.2104	-4.18608	4.18608	17.5918	-9.21276	9.21276	15.4681
Hssf038	CMC		XVII-B:303	Hss	f	Hom	1	sap	0	38.55	39.24	-12.2647	12.2647	4.98655	23.0995	-23.0995	-17.7446	31.0266	-31.0266	-24.0563	-5.55696	5.55696	11.6975	-1.88523	1.88523	7.28484
Hssm039	CMC		XVII-B:316	Hss	m	Hom	1	sap	1	44.07	43.95	-19.1256	19.1256	18.4636	10.887	-10.887		15.8813	-15.8813	-21.8783	-2.31625	2.31625
Hspm057	CMC		19G35C2	Hsp	m	Hom	1	sap	1		49.79	-2.86872	2.86872	2.93049	-0.327055	0.327055	-8.41987	14.0585	-14.0585		-11.0059	11.0059		-13.2597	13.2597	19.1728
Hspm058	CMC		19G35C3	Hsp	m	Hom	1	sap	1	49.14	50.2	-11.8683	11.8683	8.23271	12.3549	-12.3549	-13.9178	20.8123	-20.8123	-22.5709	6.3677	-6.3677	3.02165	-5.96499	5.96499	16.5879
Hspm059	CMC		19G35D1	Hsp	m	Hom	1	sap	1	49.85	50.1	-5.44909	5.44909	9.40262	9.35171	-9.35171	-18.1639	5.11511	-5.11511		-9.92151	9.92151		-16.8136	16.8136
Hspm060	CMC		19G37E5	Hsp	m	Hom	1	sap	1	48.87	51.01			-0.47268			-16.1312			-15.7669			7.56917			6.14608
Hspm061	CMC		19G37E6	Hsp	m	Hom	1	sap	1	48.14	49.4			-1.94588	6.55606	-6.55606	-11.4894	15.3848	-15.3848	-11.1112	-4.71543	4.71543	23.0592	-6.13179	6.13179
Hspm069	CMC		39G6B2-49	Hsp	m	Hom	1	sap	1	46.7	45.82	-6.58475	6.58475	4.1587	8.13475	-8.13475	-16.6277	20.499	-20.499	-16.888	-1.90935	1.90935	20.6855	-3.75785	3.75785	17.4037
Hspi075	CMC		LG-S-6	Hsp	i	Hom	1	sap				4.3166	-4.3166	6.91141	-0.804835	0.804835	-8.45491	16.8244	-16.8244	-15.803	-13.0938	13.0938	7.34996	-8.14581	8.14581	7.97362
Hspf076	CMC		LG-S-8	Hsp	f	Hom	1	sap	0			0.807352	-0.807352	15.9829	17.655	-17.655	-19.6842	21.8388	-21.8388		-4.93242	4.93242	11.8748	-20.9988	20.9988
Hspi077	CMC		LG-S-3	Hsp	i	Hom	1	sap				-10.0608	10.0608		14.2031	-14.2031	-16.4663	23.3344	-23.3344	-22.1336			13.3797			0.107831
Hspm078	CMC		LG-S-16	Hsp	m	Hom	1	sap	1			5.92535	-5.92535	-4.98532	13.8052	-13.8052	-11.4616	16.2186	-16.2186	-12.1989	-10.1232	10.1232	16.0564	-15.729	15.729	15.1523
Hspm079	CMC		LG-S-2	Hsp	m	Hom	1	sap	1					-1.81799	3.85031	-3.85031	-3.87137	10.9087	-10.9087	-16.291	-1.99582	1.99582	8.05921	-7.52207	7.52207
Hspi080	CMC		LG-S-4	Hsp	i	Hom	1	sap				-7.21351	7.21351	-6.25896	5.25126	-5.25126	-11.7428	4.89231	-4.89231	-15.1189	-8.45973	8.45973	12.9649	-14.5746	14.5746	-0.449513
Hssi081	CMC		XV-A-85	Hss	i	Hom	1	sap				-13.8568	13.8568		14.2053	-14.2053	-18.2219							-3.10232	3.10232
Hssi082	CMC		XV-A-63	Hss	i	Hom	1	sap				1.15407	-1.15407		18.5322	-18.5322	-26.3501						8.69053
Hssi084	CMC		XV-A-44	Hss	i	Hom	1	sap									-14.2983
Hssi085	CMC		XV-A-94	Hss	i	Hom	1	sap				-6.4236	6.4236				-17.0302	31.7623	-31.7623	-21.4762			8.73204			12.5682
Hssi086	CMC		XVI-A-105	Hss	i	Hom	1	sap				-11.2647	11.2647	9.75758	12.9722	-12.9722	-19.3186	28.9294	-28.9294	-25.677	7.33415	-7.33415	0.634488			17.9567
Hssi087	CMC		XVII-B-176	Hss	i	Hom	1	sap				-23.0321	23.0321	16.6974	12.5924	-12.5924	-11.4251	20.0279	-20.0279	-28.0211	-14.6105	14.6105	-4.57483	-19.5018	19.5018	5.44715
Hssi089	CMC		XVII-B:62	Hss	i	Hom	1	sap						10.3612			-25.0089			-20.419
Hssm090	CMC		XVII-B-166	Hss	m	Hom	1	sap	1			4.81571	-4.81571		25.6166	-25.6166	-15.5977	33.7831	-33.7831	-30.8707	-11.8548	11.8548				8.8243
Hssf091	CMC		XVII-B-148	Hss	f	Hom	1	sap	0			-12.9234	12.9234		12.363	-12.363	-17.474	18.8986	-18.8986	-30.039	-8.12244	8.12244				8.43426
Hssf092	CMC		XVII-B-152	Hss	f	Hom	1	sap	0			-6.21629	6.21629		6.10574	-6.10574		13.658	-13.658		-24.0919	24.0919		-5.69618	5.69618
Hssm093	CMC		XVII-B-156	Hss	m	Hom	1	sap	1						15.381	-15.381	-15.9576	23.1302	-23.1302	-22.8386						4.51028
Hssf094	CMC		XVII-B-149	Hss	f	Hom	1	sap	0			2.65739	-2.65739		12.0083	-12.0083		18.8753	-18.8753		-6.23743	6.23743		-15.9315	15.9315
Hssf095	CMC		XVII-B-158	Hss	f	Hom	1	sap	0			-11.5777	11.5777		22.2883	-22.2883		25.127	-25.127					-0.691069	0.691069
Hssm096	CMC		XVII-B-170	Hss	m	Hom	1	sap	1			-15.6696	15.6696		16.091	-16.091		34.3724	-34.3724		2.84554	-2.84554
Hssm097	CMC		XVII-B-172	Hss	m	Hom	1	sap	1			4.301	-4.301		18.2583	-18.2583		35.6486	-35.6486		-28.4588	28.4588
Hssf098	CMC		XVII-B-177	Hss	f	Hom	1	sap	0			-19.3163	19.3163		17.0272	-17.0272		20.5715	-20.5715		-13.552	13.552		-11.2257	11.2257
Hssm099	CMC		XVII-B-178	Hss	m	Hom	1	sap	1			-12.9854	12.9854		7.34563	-7.34563	-15.0126			-25.8609	-5.09647	5.09647
Hssf100	CMC		XVII-B-181	Hss	f	Hom	1	sap	0					4.99092	12.4797	-12.4797	-18.5049	35.7838	-35.7838	-29.5411	-4.02579	4.02579	26.3588			14.842
Hssf101	CMC		XVII-B-192	Hss	f	Hom	1	sap	0					19.9161			-27.1521						5.37864
Hssm102	CMC		XVII-B-196	Hss	m	Hom	1	sap	1						6.25272	-6.25272	-8.52873			-18.3558	-8.61402	8.61402		-12.5711	12.5711	14.0769
Hssf103	CMC		XVII-B-197	Hss	f	Hom	1	sap	0									22.7146	-22.7146
Hssm104	CMC		XVII-B-311	Hss	m	Hom	1	sap	1					9.52012	14.8064	-14.8064	-19.1732	22.5694	-22.5694	-22.8996	-7.00358	7.00358		-10.0445	10.0445
Hssm105	CMC		XVII-B-312	Hss	m	Hom	1	sap	1			-8.93135	8.93135		8.92172	-8.92172	-6.40921	27.0645	-27.0645	-21.2232	-7.3166	7.3166		-11.1748	11.1748
Hssm106	CMC		XVII-B-315	Hss	m	Hom	1	sap	1			-3.36589	3.36589	18.8843	7.92495	-7.92495		21.4791	-21.4791		-5.93447	5.93447	8.09372	1.44735	-1.44735	11.9791
Hspi108	CMC		19g37f5	Hsp	i	Hom	1	sap				1.43646	-1.43646	7.36751	6.34992	-6.34992	-14.992	18.452	-18.452	-21.1679	-17.8714	17.8714	10.6699	-14.6961	14.6961	30.6319
Ptim004	CMNH	Wild	B1056	Pti	m	Pan	2	trog	1	35.2	35.6				10.7995	-10.7995		-0.38484	0.38484	-4.58979	-4.06328	4.06328	1.34079	10.7172	-10.7172	0.0218329
Pttf005	CMNH	Wild	B1426	Ptt	f	Pan	2	trog	0	31.7	31.4				26.109	-26.109		4.09728	-4.09728		-1.80204	1.80204	3.17143			-1.71666
Ptif006	CMNH	Wild	B1434	Pti	f	Pan	2	trog	0	36.2	36.1	28.2992	-28.2992	-19.605	10.5835	-10.5835	-16.0753	-3.5772	3.5772	-14.6666	-3.08007	3.08007	-12.4798			5.71616
Pttf007	CMNH	Wild	B1706	Ptt	f	Pan	2	trog	0	34.2	34.1	6.77001	-6.77001	-8.0592	9.78427	-9.78427	-14.6255	-4.86237	4.86237	-2.68435	-1.26427	1.26427
Pttf008	CMNH	Wild	B1707	Ptt	f	Pan	2	trog	0	30.7	30.7				15.4512	-15.4512	-21.1024	8.06658	-8.06658		-10.4496	10.4496	-5.61703	-5.02569	5.02569
Pttm009	CMNH	Wild	B1708	Ptt	m	Pan	2	trog	1	35	34.7	23.4832	-23.4832		5.14243	-5.14243		-1.34153	1.34153		-10.7517	10.7517		-21.2462	21.2462
Pttf010	CMNH	Wild	B1713	Ptt	f	Pan	2	trog	0	31.7	31.8	12.854	-12.854	-23.6372	18.8703	-18.8703	-15.6669	-2.27024	2.27024	6.70436	-0.851914	0.851914	8.57195	-2.19484	2.19484
Pttm011	CMNH	Wild	B1718	Ptt	m	Pan	2	trog	1	32.8	32.6				10.6742	-10.6742		7.72369	-7.72369		-2.36388	2.36388		-4.12403	4.12403
Pttf012	CMNH	Wild	B1719	Ptt	f	Pan	2	trog	0	33.6	33.2				20.3828	-20.3828		-0.822998	0.822998		1.38888	-1.38888		-6.09278	6.09278
Pttf013	CMNH	Wild	B1720	Ptt	f	Pan	2	trog	0	30.2	30				18.9769	-18.9769	-16.8516	-2.55378	2.55378	-6.80113	-0.784969	0.784969	-2.72394	-8.57804	8.57804	9.05575
Pttf014	CMNH	Wild	B1721	Ptt	f	Pan	2	trog	0	31.4	30.1						-11.1622			-10.5736			1.33249			-1.40673
Pttm015	CMNH	Wild	B1722	Ptt	m	Pan	2	trog	1	36.2	36.6							6.32567	-6.32567	-16.2981	-7.30286	7.30286	-2.16887			18.1826
Pttf016	CMNH	Wild	B1723	Ptt	f	Pan	2	trog	0	35.3	35.5				23.809	-23.809	-19.2722	10.4432	-10.4432	-12.3487	6.64561	-6.64561	1.75672	4.11718	-4.11718	1.14533
Pttm017	CMNH	Wild	B1726	Ptt	m	Pan	2	trog	1	36.5	36.8				9.57302	-9.57302	-12.437	-5.58999	5.58999	0.72507	-11.7204	11.7204	-9.99918	-14.2921	14.2921	-1.68049
Pttm018	CMNH	Wild	B1738	Ptt	m	Pan	2	trog	1	35	33.6			-8.03463	14.8085	-14.8085		9.64607	-9.64607		5.7163	-5.7163		-15.168	15.168
Pttm019	CMNH	Wild	B1739	Ptt	m	Pan	2	trog	1	34.3	34.3	17.0571	-17.0571	-13.5468	28.6328	-28.6328	-14.9775	13.0265	-13.0265	-3.18278	2.57092	-2.57092	-0.437427	-20.9611	20.9611	10.018
Pttf020	CMNH	Wild	B1755	Ptt	f	Pan	2	trog	0	31.1	31	10.4655	-10.4655	-21.0546	8.09668	-8.09668	-22.6973	1.12421	-1.12421	-11.9818	-19.6461	19.6461	2.14421			-10.2357
Pttm021	CMNH	Wild	B1758	Ptt	m	Pan	2	trog	1	35.8	35	43.2534	-43.2534	-18.0152	10.6115	-10.6115	-1.49353	7.67959	-7.67959		-1.25919	1.25919	7.07965	-11.0892	11.0892	3.88609
Pttf022	CMNH	Wild	B1759	Ptt	f	Pan	2	trog	0	31	31.3	10.09	-10.09	-10.3394	18.599	-18.599	-18.0275	9.91138	-9.91138	-2.01089	-6.23329	6.23329	2.80323	-5.71477	5.71477	4.24049
Pttm023	CMNH	Wild	B1761	Ptt	m	Pan	2	trog	1	34.1	33.9						-17.8243			-5.70234			1.93897			-14.1902
Pttf024	CMNH	Wild	B1762	Ptt	f	Pan	2	trog	0	37.7	36.1	22.9042	-22.9042	-10.0066
Pttf025	CMNH	Wild	B1766	Ptt	f	Pan	2	trog	0	37.1	36	12.9976	-12.9976	-5.71328	20.1628	-20.1628	-7.58118			5.44048	-13.4865	13.4865		-22.528	22.528
Pttm026	CMNH	Wild	B1768	Ptt	m	Pan	2	trog	1	32.1	32.2	-0.934241	0.934241	-17.4441	12.22	-12.22	-13.0581	5.43684	-5.43684	-4.10882	0.835024	-0.835024	-7.151	-8.49534	8.49534	-1.39095
Pttf027	CMNH	Wild	B1843	Ptt	f	Pan	2	trog	0	34.1	34.2	23.5688	-23.5688	-22.8701	27.8592	-27.8592		-9.17713	9.17713	-2.54131	-10.2727	10.2727	-0.889199	-17.3956	17.3956	3.17921
Pttf028	CMNH	Wild	B1853	Ptt	f	Pan	2	trog	0	34.2	33.7				21.0184	-21.0184	-21.9911	-5.64671	5.64671	4.94809	-7.82765	7.82765	-6.97539	-1.9641	1.9641	-14.6269
Pttm029	CMNH	Wild	B1882	Ptt	m	Pan	2	trog	1	32.7	32.5			-20.0441			-8.77138			-0.14743			4.36629			1.89263
Pttm030	CMNH	Wild	B2026	Ptt	m	Pan	2	trog	1	35.8	35.9	38.2264	-38.2264	-22.9316	-1.8991	1.8991	-10.03	-3.33161	3.33161	-2.64551	-0.836255	0.836255	-1.19099	3.12255	-3.12255	-2.48389
Pttm031	CMNH	Wild	B2027	Ptt	m	Pan	2	trog	1	34	33.9	6.6574	-6.6574	-23.4322	0.88352	-0.88352	-5.36761	7.06239	-7.06239	-13.5728	-13.2024	13.2024	13.9195	-7.00711	7.00711	15.9581
Ptif032	CMNH	Wild	B2730	Pti	f	Pan	2	trog	0	33.2	33.4	8.70335	-8.70335	-20.1588	6.0019	-6.0019	-5.50063	-0.556192	0.556192	-6.62746	6.31446	-6.31446	-1.59327	-0.984141	0.984141	7.66481
Pttm034	CMNH	Wild	B2747	Ptt	m	Pan	2	trog	1	33.5	32.3	26.0976	-26.0976	-21.9843	11.1072	-11.1072	-8.38586	9.89801	-9.89801	-0.500181	-11.9181	11.9181	-0.473152			5.61739
Pttf035	CMNH	Wild	B2771	Ptt	f	Pan	2	trog	0	29.9	29.5			-10.7015	7.28473	-7.28473	-13.4361	7.775	-7.775	-15.3647	5.2127	-5.2127	-3.78547	-8.83599	8.83599	11.2771
Pttf036	CMNH	Wild	B3551	Ptt	f	Pan	2	trog	0	29.2	28.7			-19.6383	15.2487	-15.2487	-6.46665	4.89765	-4.89765	-7.73936	-4.83474	4.83474	-3.78831	-7.18389	7.18389	4.70835
Pttm037	CMNH	Wild	B3552	Ptt	m	Pan	2	trog	1	34.4	34.6				12.6845	-12.6845	-10.2083	-0.213949	0.213949	-12.2003	-8.6498	8.6498	3.82745	-24.7559	24.7559	-6.2366
Ptif102	Zurich	Wild	7127	Pti	f	Pan	2	trog	0					-11.0343	10.9331	-10.9331	-11.4748	3.1647	-3.1647	-6.72521	-11.2627	11.2627	3.47216	0.512915	-0.512915	1.32489
Pttf103	Zurich	Wild	7078	Ptt	f	Pan	2	trog	0						12.9491	-12.9491	-15.0804	5.43432	-5.43432	-14.0376	-10.8512	10.8512	15.8414	-15.0005	15.0005	6.3087
Pttf108	Zurich	wild	AS-1586	Ptt	f	Pan	2	trog	0			13.2129	-13.2129	-13.3591	-0.0749228	0.0749228	-2.54903	17.0561	-17.0561	-12.3214	-6.24712	6.24712	8.1152	-12.4436	12.4436	8.11635
Pttf110	Zurich	wild	PAL-9	Ptt	f	Pan	2	trog	0			17.1653	-17.1653	-8.30547	10.3642	-10.3642	-4.16754	15.08	-15.08	-8.98006	-15.38	15.38	18.2237	-16.8487	16.8487	24.4987
Ptsf301	NMNH	Budongo Forest, Nabea, Uganda	236971	Pts	f	Pan	2	trog			28.56			-18.3228			-24.0424			-16.5617			13.8552			18.4938
Ptvf302	NMNH	Niebe, Cote d'Ivoire	477333	Ptv	f	Pan	2	trog			31.20			-19.492			-1.85766			-10.0901			7.17592			7.28907
Ptvf303	NMNH	Tars Town, 2km N Zwedru, Grand Gedeh, Liberia	481803	Ptv	f	Pan	2	trog			31.42			-18.2811			-7.0626			-15.9339			8.74683			14.8567
Ptvm304	NMNH	Tars Town, 2km N Zwedru, Grand Gedeh, Liberia	481804	Ptv	m	Pan	2	trog			31.97	20.107	-20.107		6.16887	-6.16887		1.51846	-1.51846		-8.60318	8.60318		-8.24361	8.24361
Ggbf302	NMNH	Tsundura, Rwanda	396935	Ggb	f	Gor	3	3.2	0					-17.8826			-16.8066			-18.944			6.55471			19.1089
Ggbf306	NMNH	Mt Karisimbi, Cina Tembo, Rwanda	396937	Ggb	f	Gor	3	3.2	0					-4.85989			-13.4385			-22.6927			13.9187			15.397
Ggbf307	NMNH	Viruga Mnts, Mt Viroke, Rwanda	545046	Ggb	f	Gor	3	3.2	0					4.84113	8.86852	-8.86852							4.39112			17.0689
Ggbf309	NMNH	Viruga Mnts, Mt Viroke, Rwanda	545045	Ggb	f	Gor	3	3.2	0					-4.37134			-7.60451			-24.4764			-0.747037			30.5997
Ggbm301	NMNH	Viruga Mnts, Mt Viroke, Rwanda	395636	Ggb	m	Gor	3	3.2	1					3.11748			-7.26599			-12.8422			12.3654			27.9998
Ggbm303	NMNH	Tsundura, Rwanda	396934	Ggb	m	Gor	3	3.2	1					-5.42512			-11.4248			-31.6581			6.5949			12.9992
Ggbm304	NMNH	Mt Mahavura, Mt M'Gahingo, Rwanda	397351	Ggb	m	Gor	3	3.2	1					-2.85127			-5.92291			-25.342			9.97363			20.5888
Ggbm305	NMNH	Mnts N of Lake Kivu, Nord-Kivu, Zaire	239883	Ggb	m	Gor	3	3.2	1					-9.42451			-8.813			-9.76438			10.195			29.3335
Ggbm308	NMNH	Viruga Mnts, Mt Viroke, Rwanda	545048	Ggb	m	Gor	3	3.2	1						-1.28466	1.28466		19.6333	-19.6333		0.430053	-0.430053		-15.8119	15.8119
Gggf014	CMNH	Wild	B1743	Ggg	f	Gor	3	3	0	40.1	39.3	8.05367	-8.05367	-5.96905	11.4654	-11.4654	-14.632	0.0333446	-0.0333446	-10.2887	-2.97016	2.97016	-1.96827	-14.0796	14.0796	7.39537
Gggf016	CMNH	Wild	B1756	Ggg	f	Gor	3	3	0	38.8	40.3				10.6893	-10.6893	-21.2454	-4.14111	4.14111	0.239715	-9.24074	9.24074	5.18351	-28.0701	28.0701	5.2025
Gggf017	CMNH	Wild	B1765	Ggg	f	Gor	3	3	0	39	39.7				7.16255	-7.16255		-3.36237	3.36237	-4.76297	-13.5132	13.5132
Gggf020	CMNH	Wild	B1798	Ggg	f	Gor	3	3	0	41.5	42	10.9974	-10.9974	0.786087	8.50953	-8.50953	-13.7011	6.25745	-6.25745	-11.6575	-8.20901	8.20901	-14.064	-12.2404	12.2404	-1.34037
Gggf021	CMNH	Wild	B1801	Ggg	f	Gor	3	3	0	40.3	40	12.8867	-12.8867	-14.4956	10.054	-10.054	-14.2643	-1.28987	1.28987	-8.27694	-11.1278	11.1278	-0.764337	-6.52277	6.52277	14.8652
Gggf023	CMNH	Wild	B1846	Ggg	f	Gor	3	3	0	40.1	39.8	7.0253	-7.0253	-11.9699	14.8571	-14.8571	-7.14052	3.40886	-3.40886	-4.46833	3.80686	-3.80686	-4.99171	-6.21974	6.21974	1.5039
Gggf024	CMNH	Wild	B1851	Ggg	f	Gor	3	3	0	39.9	40.2	12.1501	-12.1501	13.5553	11.0833	-11.0833	-16.4454	11.5214	-11.5214	-11.808	-4.45945	4.45945	-2.37689	-0.0905355	0.0905355	-12.4137
Gggf025	CMNH	Wild	B1852	Ggg	f	Gor	3	3	0	36.4	36.6	5.0279	-5.0279	-8.56296	13.5565	-13.5565	-8.34586	3.19138	-3.19138	0.617177	-5.9497	5.9497		-17.4058	17.4058	13.3567
Gggf026	CMNH	Wild	B1854	Ggg	f	Gor	3	3	0	42.5	42	-3.2887	3.2887	0.24189	13.1598	-13.1598	-14.5386	2.98309	-2.98309	-11.3558	-11.0188	11.0188	0.286143	-25.7458	25.7458	8.3522
Gggf031	CMNH	Wild	B1996	Ggg	f	Gor	3	3	0	38.2	38.8	5.42829	-5.42829	1.82762	8.3139	-8.3139	-3.6043	4.51904	-4.51904	-0.729663	-2.26485	2.26485	-0.672071	-9.15589	9.15589	5.05203
Gggf032	CMNH	Wild	B1997	Ggg	f	Gor	3	3	0	39.2	39.2	3.23134	-3.23134	3.38654	1.94818	-1.94818	-10.2785	4.75755	-4.75755	-6.90269	-5.49228	5.49228	9.96344	-4.44683	4.44683
Gggf033	CMNH	Wild	B2069	Ggg	f	Gor	3	3	0	38.2	38.4	12.7366	-12.7366	-10.6107			-11.6887	3.42284	-3.42284	-3.5697	-2.7776	2.7776	3.68049	-21.5776	21.5776	6.14615
Gggf034	CMNH	Wild	B2782	Ggg	f	Gor	3	3	0	39.9	39.6				13.9189	-13.9189	-15.0875	8.59515	-8.59515	-9.74365	-6.87915	6.87915	9.02516
Gggf036	CMNH	Wild	B3393	Ggg	f	Gor	3	3	0	39	39							-4.97273	4.97273	-1.26373	-9.59655	9.59655	5.31103	-14.4379	14.4379	12.8906
Gggf101	Zurich	wild	7075	Ggg	f	Gor	3	3	0			3.86048	-3.86048		2.13973	-2.13973		16.3785	-16.3785		-6.2957	6.2957		-7.30858	7.30858
Gggf103	Zurich	wild	7010	Ggg	f	Gor	3	3	0			16.6524	-16.6524		5.63056	-5.63056	-5.59291	16.0129	-16.0129	-14.4629	1.55752	-1.55752	5.89935	-5.92551	5.92551	3.08873
Gggf106	Zurich	wild	6840	Ggg	f	Gor	3	3	0			5.94156	-5.94156	-16.1105	4.22314	-4.22314	-11.564	9.90846	-9.90846	-14.8879	-4.54151	4.54151	-1.36355	-9.7987	9.7987	9.73526
Gggf109	Zurich	wild	PAL-14	Ggg	f	Gor	3	3	0			13.8888	-13.8888	-7.03246	2.19221	-2.19221	-13.533	14.0099	-14.0099	-24.8445	-8.58978	8.58978	0.957385	-15.7714	15.7714	13.8707
Gggf115	Zurich	wild	PAL-2	Ggg	f	Gor	3	3	0					-14.5932						-17.3086
Gggf119	Zurich	wild	6896	Ggg	f	Gor	3	3	0			25.4127	-25.4127	-23.8089	7.88104	-7.88104	-13.342	-6.75803	6.75803	-21.9439	-15.0569	15.0569	5.84252	-26.3482	26.3482	7.17163
Gggm001	CMNH	Wild	B1407	Ggg	m	Gor	3	3	1	55.5	56.8			-20.9928	8.69089	-8.69089	-3.48222	3.11025	-3.11025	-6.4297	1.23817	-1.23817	1.21694	-4.0798	4.0798
Gggm002	CMNH	Wild	B1408	Ggg	m	Gor	3	3	1	51	51.7	19.3295	-19.3295	6.61318	16.269	-16.269	-19.1905	3.96302	-3.96302	-6.09768	1.44907	-1.44907	-2.55301	-1.41455	1.41455	9.57796
Gggm003	CMNH	Wild	B1409	Ggg	m	Gor	3	3	1	51.9	51.7	6.97023	-6.97023	-18.9762	13.6795	-13.6795	-10.2826	14.6292	-14.6292	-6.58297	-11.8261	11.8261	4.31314			6.3128
Gggm004	CMNH	Wild	B1416	Ggg	m	Gor	3	3	1	48.9	50.1	0.0167856	-0.0167856		14.5093	-14.5093		-5.06464	5.06464		-2.39272	2.39272		-24.6034	24.6034
Gggm010	CMNH	Wild	B1730	Ggg	m	Gor	3	3	1	52.3	52.6	10.0304	-10.0304		9.15429	-9.15429	-15.4834	-2.70455	2.70455	-8.50643	-7.99183	7.99183	-3.62769
Gggm011	CMNH	Wild	B1731	Ggg	m	Gor	3	3	1	46.8	47.2	17.3588	-17.3588	-9.7795	3.41402	-3.41402	-13.2679	-4.29922	4.29922	-2.48863	-14.6034	14.6034	-5.64571	-16.7962	16.7962	11.7123
Gggm012	CMNH	Wild	B1732	Ggg	m	Gor	3	3	1	49.7	49.9									-4.03763				7.11355	-7.11355
Gggm013	CMNH	Wild	B1733	Ggg	m	Gor	3	3	1	51.9	53.6	1.36595	-1.36595	-4.76296	-0.317091	0.317091	-2.77452	1.9975	-1.9975	-3.07647	-10.1689	10.1689	11.816	-12.2062	12.2062
Gggm015	CMNH	Wild	B1746	Ggg	m	Gor	3	3	1	50.3	50.8	0.362905	-0.362905		13.0246	-13.0246	-20.3592				-10.1317	10.1317	13.011	-28.5442	28.5442	20.2932
Gggm018	CMNH	Wild	B1787	Ggg	m	Gor	3	3	1	48.6	47.7	23.3488	-23.3488	-7.80536	10.1196	-10.1196	-14.3387	6.76041	-6.76041	3.65236	0.33058	-0.33058		-19.9519	19.9519	16.0251
Gggm019	CMNH	Wild	B1796	Ggg	m	Gor	3	3	1	46.2	46.2	-0.242873	0.242873		3.71934	-3.71934	-9.28928	3.5093	-3.5093	-4.66288	-4.87895	4.87895	3.74072	-2.52734	2.52734	3.23478
Gggm027	CMNH	Wild	B1857	Ggg	m	Gor	3	3	1	52.7	52.5	-4.34879	4.34879	0.808616	10.8882	-10.8882	-5.95782	8.67949	-8.67949	-4.25766	3.88802	-3.88802	-5.68728	-5.38027	5.38027	12.2903
Gggm028	CMNH	Wild	B1859	Ggg	m	Gor	3	3	1	50.4	50.3	7.17112	-7.17112	-2.68629	18.3609	-18.3609	-9.14482			2.97997	-11.6439	11.6439		-23.7372	23.7372	7.65399
Gggm029	CMNH	Wild	B1954	Ggg	m	Gor	3	3	1	50.8	50.9	0.9109	-0.9109	-1.60295	12.5208	-12.5208	2.86557				-17.3082	17.3082	3.47507	-4.347	4.347	3.71713
Gggm030	CMNH	Wild	B1991	Ggg	m	Gor	3	3	1	48.5	48.4													-16.8198	16.8198
Gggm102	Zurich	wild	7011	Ggg	m	Gor	3	3	1					-17.7729	18.1916	-18.1916		14.2158	-14.2158		-2.95751	2.95751		-16.2661	16.2661
Gggm104	Zurich	wild	6884	Ggg	m	Gor	3	3	1								-12.3636			-6.52371			-3.65304			4.42762
Gggm105	Zurich	wild	6841	Ggg	m	Gor	3	3	1					-14.8017			-16.1432			-5.18706			8.94927			19.0716
Gggm107	Zurich	wild	7487	Ggg	m	Gor	3	3	1									-16.7562	16.7562	-22.9734	0.758231	-0.758231	4.87552			7.81483
Gggm108	Zurich	wild	PAL-241	Ggg	m	Gor	3	3	1					-7.02662	9.29319	-9.29319	-20.3645			-21.2772	-12.9869	12.9869	7.92532	-21.3743	21.3743	26.8504
Gggm110	Zurich	wild	PAL-13	Ggg	m	Gor	3	3	1					-0.973145	14.3854	-14.3854	-17.2023	19.7746	-19.7746	-23.9963	9.70838	-9.70838	-3.26975	-0.0631984	0.0631984	8.76691
Gggm111	Zurich	wild	PAL-12	Ggg	m	Gor	3	3	1			13.6462	-13.6462	-18.863			-5.49457	12.9739	-12.9739	-13.942	-9.74216	9.74216	6.46439	-17.4381	17.4381	20.0113
Gggm112	Zurich	wild	PAL-11	Ggg	m	Gor	3	3	1			5.69242	-5.69242	-9.47324	3.86836	-3.86836	-11.9791	5.38009	-5.38009	-15.6475	-1.90413	1.90413	2.86589	-7.70466	7.70466	-1.57197
Gggm113	Zurich	wild	PAL-8	Ggg	m	Gor	3	3	1			10.0777	-10.0777	-6.93723	10.6993	-10.6993	-10.6937	6.24849	-6.24849	-12.6574	-9.37454	9.37454	8.7768			18.9589
Gggm116	Zurich	wild	AS-1690	Ggg	m	Gor	3	3	1			8.04836	-8.04836		8.54577	-8.54577		18.2129	-18.2129	-16.3651	-9.50539	9.50539	3.5269	-10.0995	10.0995	19.8518
Gggm120	Zurich	wild	6680	Ggg	m	Gor	3	3	1								-4.28559			-12.8435	-1.87974	1.87974	6.65197	-8.97153	8.97153	11.4481
Gggm123	Zurich	wild, subad.	7035	Ggg	m	Gor	3	3	1					-9.75463			-10.003			-20.2549			-1.36471			10.1728
Ggim005	CMNH	Wild	B1430	Ggi	m	Gor	3		1	51.2	51.8			11.7117			-0.706209			-2.34889			10.5117			18.0744
Ggim006	CMNH	Wild	B1431	Ggi	m	Gor	3		1	49.7	48.2	5.6913	-5.6913	-6.12813	10.3265	-10.3265	-5.53481	0.866847	-0.866847	-5.27787	-12.1212	12.1212	17.1773	-12.3353	12.3353	17.3478
Ppim101A	CMNH	wild	B623	Ppi	m	Pon	4	pyg	1	37.2	36.5			-14.9709	10.5976	-10.5976				-1.40015	-4.57424	4.57424	11.3197	-11.8206	11.8206	15.7553
Ppaf102A	CMNH	wild	B1030	Ppa	f	Pon	4	pyg	0	30.6	30.4			-5.13994	5.66342	-5.66342	-10.5615	-2.53176	2.53176	0.246288	-12.3192	12.3192	15.7323	-4.37346	4.37346	7.69563
Ppaf103A	CMNH	wild	B1055	Ppa	f	Pon	4	pyg	0	33.1	33.8	-4.96373	4.96373	-3.82992	12.761	-12.761	-22.1811	4.65837	-4.65837	-10.7865	-10.2533	10.2533		-3.20536	3.20536	-1.35162
Ppaf104A	CMNH	wild	B1443	Ppa	f	Pon	4	pyg	0	29.7	29.2			12.4598			-13.9933			-6.39846			-2.57422			4.05027
Ppam105A	CMNH	wild	B1444	Ppa	m	Pon	4	pyg	1	37.5	37.6	-12.9246	12.9246	-3.85366	15.7518	-15.7518	-22.694	0.3909	-0.3909	-1.75772	5.3808	-5.3808	3.57559	-15.2807	15.2807	12.097
Pppm101	Zurich	wild	AS-1531	Ppp	m	Pon	4	pyg	1			9.98874	-9.98874	3.79238	12.8522	-12.8522	-25.7786	15.3072	-15.3072	-21.6066	0.566501	-0.566501	3.33856	14.9024	-14.9024	1.85349
Pppf102	Zurich	wild	AS-1554	Ppp	f	Pon	4	pyg	0					3.15397	13.3732	-13.3732	-12.3225	0.110148	-0.110148	-15.4965	-9.46882	9.46882	2.95674	-15.2542	15.2542	10.5637
Pppm103	Zurich	wild, subad.	AS-1561	Ppp	m	Pon	4	pyg	1											-28.3034			-3.48779			8.1172
Ppaf109	Zurich	wild	AS-1739	Ppa	f	Pon	4	pyg	0			-4.69017	4.69017	3.69818			-21.0387			-9.35886	-6.53606	6.53606	2.53897			7.40919
Ppaf305	NMNH	Aru Bay, Sumatra	143596	Ppa	f	Pon	4	pyg	0			-19.6882	19.6882		19.0472	-19.0472	-24.5735	4.86761	-4.86761	-11.3372	-3.20911	3.20911	-4.75297	4.79701	-4.79701	-6.51804
Ppam307	NMNH	Aru Bay, Sumatra	143593	Ppa	m	Pon	4	pyg	1			-14.5017	14.5017		27.26	-27.26		14.887	-14.887		4.35789	-4.35789		-2.69948	2.69948
PPam309	NMNH	Aru Bay, Sumatra	143590	PPa	m	Pon	4	pyg	1			-12.4026	12.4026				-16.3886									2.79473
Ppaf310	NMNH	Aru Bay, Sumatra	143601	Ppa	f	Pon	4	pyg	0			-6.42492	6.42492	2.02862	28.7978	-28.7978		18.179	-18.179	-20.4398	1.05608	-1.05608	-4.41382	11.527	-11.527	-5.5331
Ppaf312	NMNH	Aru Bay, Sumatra	143602	Ppa	f	Pon	4	pyg	0					11.2065			-21.8914			-12.5032			-3.1296			0.362575
Ppaf313	NMNH	Aru Bay, Sumatra	143597	Ppa	f	Pon	4	pyg	0			-8.30689	8.30689	10.2105	14.3257	-14.3257		9.60017	-9.60017	-15.0154	-8.23106	8.23106	-4.55199	-2.0921	2.0921	0.275777
PPaf315	NMNH	Aru Bay, Sumatra	143598	PPa	f	Pon	4	pyg	0			-2.22076	2.22076	10.8312	29.2508	-29.2508	-34.7828	16.6913	-16.6913	-17.0128	-7.52513	7.52513	3.0302	2.23624	-2.23624	3.99974
Pppf322	NMNH	Sungai Sama, Borneo	142170	Ppp	f	Pon	4	pyg	0			-14.3558	14.3558		18.9524	-18.9524		13.0343	-13.0343		-3.49207	3.49207		0.390453	-0.390453
Pppm324	NMNH	Sempang River, Sugei Mata, Borneo	145304	Ppp	m	Pon	4	pyg	1			-21.7323	21.7323	26.5988	15.5921	-15.5921	-10.4317	4.99706	-4.99706	-4.17174	-11.7585	11.7585	13.3351	-22.1264	22.1264	10.3192
Pppf326	NMNH	Semandong River, Borneo	145302	Ppp	f	Pon	4	pyg	0			-14.6436	14.6436	19.8787	17.7431	-17.7431		14.7604	-14.7604	-7.32374	-4.48972	4.48972	4.18964	-9.7311	9.7311	8.83647
Pppm327	NMNH	Semandong River, Borneo	145301	Ppp	m	Pon	4	pyg	1					21.9857	0.400971	-0.400971		-4.89441	4.89441	1.53038			12.6824	-11.1492	11.1492
Pppm328	NMNH	Sempang River, Matan, Borneo	145309	Ppp	m	Pon	4	pyg	1			-28.2804	28.2804	38.7832	19.814	-19.814	-32.1198	18.7419	-18.7419	-12.273	-8.19769	8.19769	0.916015	4.65743	-4.65743	10.5901
Pppf329	NMNH	Sempang River, Matan, Borneo	145308	Ppp	f	Pon	4	pyg	0			-26.3723	26.3723	18.529	16.0857	-16.0857	-22.3782	14.0799	-14.0799	-10.9473	0.446951	-0.446951	3.97285	3.21873	-3.21873	4.99129
Pppm330	NMNH	Sungai Mata, Borneo	145310	Ppp	m	Pon	4	pyg	1			-15.929	15.929	11.3408	20.4451	-20.4451		-8.30568	8.30568		-15.5561	15.5561		-7.33095	7.33095	17.3928
Pppm331	NMNH	Sempang River, Sungei Matan, Borneo	145305	Ppp	m	Pon	4	pyg	1			-19.1111	19.1111		13.0883	-13.0883		17.2027	-17.2027	-17.6786	4.96586	-4.96586	1.91684			11.5607
Pppf332	NMNH	Sempang River, Sungei Matan, Borneo	145306 (A49963)	Ppp	f	Pon	4	pyg	0					7.94662			-5.59677			-1.2134			1.21082			2.32156
Pppf336	NMNH	Batu Jurong,Borneo	153805	Ppp	f	Pon	4	pyg	0			-6.71376	6.71376		19.8782	-19.8782		14.9974	-14.9974		-1.91804	1.91804
Pppf337	NMNH	Kendawangan River, Lanchut, Borneo	153823	Ppp	f	Pon	4	pyg	0			-20.6624	20.6624	17.5945	15.9149	-15.9149	-13.8744	-7.9087	7.9087	-5.0192	-8.1204	8.1204	7.13414	-1.70821	1.70821	7.97683
Pppm338	NMNH	Kendawangan River, Lanchut, Borneo	153822	Ppp	m	Pon	4	pyg	1			-6.27306	6.27306		25.2545	-25.2545		15.856	-15.856		5.62409	-5.62409		-16.2307	16.2307
Pppf343	NMNH	Sungai Sama, Borneo	142169 (A49768)	Ppp	f	Pon	4	pyg	0			-8.41929	8.41929	13.0108	8.89329	-8.89329	-31.5741	4.49571	-4.49571	-7.19016	-2.46063	2.46063	2.1572	-6.29901	6.29901	9.05349
Ppam344	NMNH	Kuala Simpang, Aceh, Sumatra	267325	Ppa	m	Pon	4	pyg	1			-15.9089	15.9089		0.171757	-0.171757		-2.5611	2.5611		-11.8039	11.8039		-5.63803	5.63803
Ssyf301	NMNH	Atjeh, Gunong Shaitan, Sumatra	271048	Ssy	f	Syn		syn				29.1127	-29.1127		4.5809	-4.5809		3.2786	-3.2786		-2.12136	2.12136		-6.65408	6.65408
Ssyf302	NMNH	Aru Bay, Sumatra	143579	Ssy	f	Syn		syn						-35.6689			-28.9772			-29.2924			-7.07374			-19.0452
Hhkm301	NMNH	Mentawai Islands, S Pagai Selatan, Sumatera Barat	A49656	Hhk	m	Hylo		klossii				33.0396	-33.0396		-7.93627	7.93627		4.93886	-4.93886		-5.66227	5.66227		29.4205	-29.4205
Hham302	NMNH	Kateman River, Sumatra	123155 (49694)	Hha	m	Hylo		agilis				-15.9187	15.9187		-3.90691	3.90691		5.8139	-5.8139		20.5947	-20.5947		14.9362	-14.9362
Hhkf303	NMNH	Mentawai Islands, S Pagai Selatan, Sumatera Barat	A49657	Hhk	f	Hylo		klossii				34.1492	-34.1492		-7.60376	7.60376		8.8552	-8.8552		-4.30938	4.30938		-26.2031	26.2031
Hhli304	NMNH	Trong, Trang, Thaniland	A49463	Hhl	i	Hylo		lar						-10.9234			-17.6849			-18.6041			-6.20754			10.3849
Hhmf305	NMNH	Sungai Djambajan, Borneo	198840	Hhm	f	Hylo		muelleri funereus						26.311			-0.938127			-12.8362			-15.7556			24.3086
Hhlf306	NMNH	Atjeh, Kungke, Sumatra	271047	Hhl	f	Hylo		lar						-24.6255			-14.0949			-14.5849			-0.498708			10.882
Hhmm307	NMNH	Mount Salak, Java	154722	Hhm	m	Hylo		moloch				43.8356	-43.8356		14.9381	-14.9381		8.93435	-8.93435		-4.96463	4.96463		2.8534	-2.8534
33316xx				333		Aus	5	afa												-23.3313
33389xx				333		Aus	5	afa																		10.4552
33348xx				333		Aus	5	afa									-1.25823
4381xxx				438		Aus	5	afa							17.489	-17.489	-14.9636			-22.925
333w-39				333		Aus	5	afa				14.2697	-14.2697
33356xx				333		Aus	5	afa															13.3373
33314xx				333		Aus	5	afa																0.319487	-0.319487
333141x				333		Aus	5	afa																-4.03272	4.03272
SKW14147				SKW		Aus	5	afr																		3.97647
Stw64				Stw		Aus	5	afr
SKW2954				SKX		Aus	5	afr													-3.5398	3.5398	3.5398
Stw68				Stw		Aus	5	afr										11.8196	-11.8196
Stw382				Stw		Aus	5	afr									-8.53744
stw418				stw		Aus	5	afr						-10.842
SK84				SK8		Aus	5	afr						-5.15737
Ptvf104	Zurich	captive	AS-1763	Ptv	f			trog	0			20.5066		-17.549	9.64846		-9.78596	12.8626		-14.8039	-9.69086		5.68013	-9.54699		15.009
Ptim105	Zurich	captive	PAL-220	Pti	m			trog	1			7.57523		-6.32388	10.8291		-7.95394	15.9163		-17.5158	1.94623		-1.89377	-18.3083		6.10066
Ptif106	Zurich	captive	PAL-219	Pti	f			trog	0			25.5421		-20.7836	8.64346		-11.7942	12.1673		-7.0455	-12.3651		3.97374	-13.8252		6.69737
Ptif107	Zurich	captive	PAL-217	Pti	f			trog	0					-18.9566			-11.475			-21.0329			3.47793			7.05869
Ptif109	Zurich	??	10533	Pti	f			trog	0			10.2002		-19.1565	15.2932		-6.35457	12.8245		-2.92371	-5.76222		4.41435	-7.89107		11.3057
Ppaf104	Zurich	captive	11444	Ppa	f			pyg	0						40.6152		-39.75	32.7261		-33.3464	0.0770295		-11.2879	-5.25363		17.8619
Ppim105	Zurich	??	PAL-101	Ppi	m			pyg	1					5.41552	2.17673		-12.1208	8.08606		-14.8895			6.08199			-1.63319
Ppim107	Zurich	??	8609	Ppi	m			pyg	1						15.7469			28.8235			-4.73418			-13.8586
Pppf110	Zurich	wild, died captive	8685	Ppp	f			pyg	0			11.842		-12.8349	32.0325		-22.4087	17.6053		-19.704	-5.52893		6.60081	-17.5726		12.6146
Ppii111	Zurich	??	10044	Ppi	i			pyg				-1.09768			21.4178			19.3805			-7.94414			3.84511
Hiif310	NMNH	?? Unknown	395156	Hii	f			lar				32.7615			17.164			11.0989			-9.38086			-12.7891
Gggf008	CMNH	Wild	B1710	Ggg	f		3	gor	0	39.5	39.5			-29.7379	24.4883	-24.4883		10.6221	-10.6221		-3.15547	3.15547		-34.778	34.778
Hssi088	CMC		XVII-B:41	Hss	i		1	sap				-11.9459	11.9459	12.0999	-3.91646	3.91646	5.53066	10.8718	-10.8718	-16.0537	6.11807	-6.11807		7.11827	-7.11827
Hspi109	CMC		19G41C1	Hsp	i		1	sap						-2.42502	1.98777	-1.98777	11.9534	15.6583	-15.6583	-13.3635	-26.3169	26.3169	9.36197	-18.1509	18.1509	14.7018
												104	104	113	133	133	128	130	130	134	134	134	126	115	115	124
	Hum												31	26		37	34		36	29		33	24		26	24
	Pan												19	25		33	31		33	32		34	33		28	31
	Gor												32	41		39	46		38	50		43	47		39	45
	Pong												22	21		24	17		23	23		24	22		22	24
	fossiles												1	2		1	3		1	2		1	2		2	2

## Sheet: Data g+
cat	gen	mc1g	mc2g	mc3g	mc4g	mc5g
Hssi030	Homo		-14.2086	-31.7501	6.45354	13.3789
Hssi031	Homo	-11.6111	-9.79343	-11.031	-0.0619425	16.7887
Hssi033	Homo	13.2893	-11.8667		9.06709	8.87359
Hssi034	Homo	-2.80661		-16.9482	0.980276	12.8494
Hssm035	Homo	-4.30505	-7.97606	-22.6043	12.49
Hssm036	Homo	12.401	-18.9811	-19.9378	14.6895	12.3968
Hssf037	Homo	5.87257	-21.386	-33.2104	17.5918	15.4681
Hssf038	Homo	4.98655	-17.7446	-24.0563	11.6975	7.28484
Hssm039	Homo	18.4636	-10.887	-21.8783	2.31625
Hspm057	Homo	2.93049	-8.41987	-14.0585	11.0059	19.1728
Hspm058	Homo	8.23271	-13.9178	-22.5709	3.02165	16.5879
Hspm059	Homo	9.40262	-18.1639	-5.11511	9.92151	16.8136
Hspm060	Homo	-0.47268	-16.1312	-15.7669	7.56917	6.14608
Hspm061	Homo	-1.94588	-11.4894	-11.1112	23.0592	6.13179
Hspm069	Homo	4.1587	-16.6277	-16.888	20.6855	17.4037
Hspi075	Homo	6.91141	-8.45491	-15.803	7.34996	7.97362
Hspf076	Homo	15.9829	-19.6842	-21.8388	11.8748	20.9988
Hspi077	Homo	10.0608	-16.4663	-22.1336	13.3797	0.107831
Hspm078	Homo	-4.98532	-11.4616	-12.1989	16.0564	15.1523
Hspm079	Homo	-1.81799	-3.87137	-16.291	8.05921	7.52207
Hspi080	Homo	-6.25896	-11.7428	-15.1189	12.9649	-0.449513
Hssi081	Homo	13.8568	-18.2219			3.10232
Hssi082	Homo	-1.15407	-26.3501		8.69053
Hssi084	Homo		-14.2983
Hssi085	Homo	6.4236	-17.0302	-21.4762	8.73204	12.5682
Hssi086	Homo	9.75758	-19.3186	-25.677	0.634488	17.9567
Hssi087	Homo	16.6974	-11.4251	-28.0211	-4.57483	5.44715
Hssi089	Homo	10.3612	-25.0089	-20.419
Hssm090	Homo	-4.81571	-15.5977	-30.8707	11.8548	8.8243
Hssf091	Homo	12.9234	-17.474	-30.039	8.12244	8.43426
Hssf092	Homo	6.21629	-6.10574	-13.658	24.0919	5.69618
Hssm093	Homo		-15.9576	-22.8386		4.51028
Hssf094	Homo	-2.65739	-12.0083	-18.8753	6.23743	15.9315
Hssf095	Homo	11.5777	-22.2883	-25.127		0.691069
Hssm096	Homo	15.6696	-16.091	-34.3724	-2.84554
Hssm097	Homo	-4.301	-18.2583	-35.6486	28.4588
Hssf098	Homo	19.3163	-17.0272	-20.5715	13.552	11.2257
Hssm099	Homo	12.9854	-15.0126	-25.8609	5.09647
Hssf100	Homo	4.99092	-18.5049	-29.5411	26.3588	14.842
Hssf101	Homo	19.9161	-27.1521		5.37864
Hssm102	Homo		-8.52873	-18.3558	8.61402	14.0769
Hssf103	Homo			-22.7146
Hssm104	Homo	9.52012	-19.1732	-22.8996	7.00358	10.0445
Hssm105	Homo	8.93135	-6.40921	-21.2232	7.3166	11.1748
Hssm106	Homo	18.8843	-7.92495	-21.4791	8.09372	11.9791
Hspi108	Homo	7.36751	-14.992	-21.1679	10.6699	30.6319
Hssi088	Homo	12.0999	5.53066	-16.0537	-6.11807	-7.11827
Hspi109	Homo	-2.42502	11.9534	-13.3635	9.36197	14.7018
Ptim004	Pan		-10.7995	-4.58979	1.34079	0.0218329
Pttf005	Pan		-26.109	-4.09728	3.17143	-1.71666
Ptif006	Pan	-19.605	-16.0753	-14.6666	-12.4798	5.71616
Pttf007	Pan	-8.0592	-14.6255	-2.68435	1.26427
Pttf008	Pan		-21.1024	-8.06658	-5.61703	5.02569
Pttm009	Pan	-23.4832	-5.14243	1.34153	10.7517	21.2462
Pttf010	Pan	-23.6372	-15.6669	6.70436	8.57195	2.19484
Pttm011	Pan		-10.6742	-7.72369	2.36388	4.12403
Pttf012	Pan		-20.3828	0.822998	-1.38888	6.09278
Pttf013	Pan		-16.8516	-6.80113	-2.72394	9.05575
Pttf014	Pan		-11.1622	-10.5736	1.33249	-1.40673
Pttm015	Pan			-16.2981	-2.16887	18.1826
Pttf016	Pan		-19.2722	-12.3487	1.75672	1.14533
Pttm017	Pan		-12.437	0.72507	-9.99918	-1.68049
Pttm018	Pan	-8.03463	-14.8085	-9.64607	-5.7163	15.168
Pttm019	Pan	-13.5468	-14.9775	-3.18278	-0.437427	10.018
Pttf020	Pan	-21.0546	-22.6973	-11.9818	2.14421	-10.2357
Pttm021	Pan	-18.0152	-1.49353	-7.67959	7.07965	3.88609
Pttf022	Pan	-10.3394	-18.0275	-2.01089	2.80323	4.24049
Pttm023	Pan		-17.8243	-5.70234	1.93897	-14.1902
Pttf024	Pan	-10.0066
Pttf025	Pan	-5.71328	-7.58118	5.44048	13.4865	22.528
Pttm026	Pan	-17.4441	-13.0581	-4.10882	-7.151	-1.39095
Pttf027	Pan	-22.8701	-27.8592	-2.54131	-0.889199	3.17921
Pttf028	Pan		-21.9911	4.94809	-6.97539	-14.6269
Pttm029	Pan	-20.0441	-8.77138	-0.14743	4.36629	1.89263
Pttm030	Pan	-22.9316	-10.03	-2.64551	-1.19099	-2.48389
Pttm031	Pan	-23.4322	-5.36761	-13.5728	13.9195	15.9581
Ptif032	Pan	-20.1588	-5.50063	-6.62746	-1.59327	7.66481
Pttm034	Pan	-21.9843	-8.38586	-0.500181	-0.473152	5.61739
Pttf035	Pan	-10.7015	-13.4361	-15.3647	-3.78547	11.2771
Pttf036	Pan	-19.6383	-6.46665	-7.73936	-3.78831	4.70835
Pttm037	Pan		-10.2083	-12.2003	3.82745	-6.2366
Ptif102	Pan	-11.0343	-11.4748	-6.72521	3.47216	1.32489
Pttf103	Pan		-15.0804	-14.0376	15.8414	6.3087
Pttf108	Pan	-13.3591	-2.54903	-12.3214	8.1152	8.11635
Pttf110	Pan	-8.30547	-4.16754	-8.98006	18.2237	24.4987
Ptsf301	Pan	-18.3228	-24.0424	-16.5617	13.8552	18.4938
Ptvf302	Pan	-19.492	-1.85766	-10.0901	7.17592	7.28907
Ptvf303	Pan	-18.2811	-7.0626	-15.9339	8.74683	14.8567
Ptvm304	Pan	-20.107	-6.16887	-1.51846	8.60318	8.24361
Gggf008		-29.7379	-24.4883	-10.6221	3.15547	34.778
Gggf014	Gor	-5.96905	-14.632	-10.2887	-1.96827	7.39537
Gggf016	Gor		-21.2454	0.239715	5.18351	5.2025
Gggf017	Gor		-7.16255	-4.76297	13.5132
Gggf020	Gor	0.786087	-13.7011	-11.6575	-14.064	-1.34037
Gggf021	Gor	-14.4956	-14.2643	-8.27694	-0.764337	14.8652
Gggf023	Gor	-11.9699	-7.14052	-4.46833	-4.99171	1.5039
Gggf024	Gor	13.5553	-16.4454	-11.808	-2.37689	-12.4137
Gggf025	Gor	-8.56296	-8.34586	0.617177	5.9497	13.3567
Gggf026	Gor	0.24189	-14.5386	-11.3558	0.286143	8.3522
Gggf031	Gor	1.82762	-3.6043	-0.729663	-0.672071	5.05203
Gggf032	Gor	3.38654	-10.2785	-6.90269	9.96344	4.44683
Gggf033	Gor	-10.6107	-11.6887	-3.5697	3.68049	6.14615
Gggf036	Gor			-1.26373	5.31103	12.8906
Gggf101	Gor	-3.86048	-2.13973	-16.3785	6.2957	7.30858
Gggf103	Gor	-16.6524	-5.59291	-14.4629	5.89935	3.08873
Gggf106	Gor	-16.1105	-11.564	-14.8879	-1.36355	9.73526
Gggf109	Gor	-7.03246	-13.533	-24.8445	0.957385	13.8707
Gggf115	Gor	-14.5932		-17.3086
Gggf119	Gor	-23.8089	-13.342	-21.9439	5.84252	7.17163
Gggm001	Gor	-20.9928	-3.48222	-6.4297	1.21694	4.0798
Gggm002	Gor	6.61318	-19.1905	-6.09768	-2.55301	9.57796
Gggm003	Gor	-18.9762	-10.2826	-6.58297	4.31314	6.3128
Gggm004	Gor	-0.0167856	-14.5093	5.06464	2.39272	24.6034
Gggm010	Gor	-10.0304	-15.4834	-8.50643	-3.62769
Gggm011	Gor	-9.7795	-13.2679	-2.48863	-5.64571	11.7123
Gggm012	Gor			-4.03763		-7.11355
Gggm013	Gor	-4.76296	-2.77452	-3.07647	11.816	12.2062
Gggm015	Gor	-0.362905	-20.3592		13.011	20.2932
Gggm018	Gor	-7.80536	-14.3387	3.65236	-0.33058	16.0251
Gggm019	Gor	0.242873	-9.28928	-4.66288	3.74072	3.23478
Gggm027	Gor	0.808616	-5.95782	-4.25766	-5.68728	12.2903
Gggm028	Gor	-2.68629	-9.14482	2.97997	11.6439	7.65399
Gggm029	Gor	-1.60295	2.86557		3.47507	3.71713
Gggm030	Gor					16.8198
Gggm102	Gor	-17.7729	-18.1916	-14.2158	2.95751	16.2661
Gggm104	Gor		-12.3636	-6.52371	-3.65304	4.42762
Gggm105	Gor	-14.8017	-16.1432	-5.18706	8.94927	19.0716
Gggm107	Gor			-22.9734	4.87552	7.81483
Gggm108	Gor	-7.02662	-20.3645	-21.2772	7.92532	26.8504
Gggm110	Gor	-0.973145	-17.2023	-23.9963	-3.26975	8.76691
Gggm111	Gor	-18.863	-5.49457	-13.942	6.46439	20.0113
Gggm112	Gor	-9.47324	-11.9791	-15.6475	2.86589	-1.57197
Gggm113	Gor	-6.93723	-10.6937	-12.6574	8.7768	18.9589
Gggm116	Gor	-8.04836	-8.54577	-16.3651	3.5269	19.8518
Gggm120	Gor		-4.28559	-12.8435	6.65197	11.4481
Gggm123	Gor	-9.75463	-10.003	-20.2549	-1.36471	10.1728
Ppim101A	Pon	-14.9709	-10.5976	-1.40015	11.3197	15.7553
Ppaf102A	Pon	-5.13994	-10.5615	0.246288	15.7323	7.69563
Ppaf103A	Pon	-3.82992	-22.1811	-10.7865	10.2533	-1.35162
Ppaf104A	Pon	12.4598	-13.9933	-6.39846	-2.57422	4.05027
Ppam105A	Pon	-3.85366	-22.694	-1.75772	3.57559	12.097
Pppm101	Pon	3.79238	-25.7786	-21.6066	3.33856	1.85349
Pppf102	Pon	3.15397	-12.3225	-15.4965	2.95674	10.5637
Pppm103	Pon			-28.3034	-3.48779	8.1172
Ppaf109	Pon	3.69818	-21.0387	-9.35886	2.53897	7.40919
Ppaf305	Pon	19.6882	-24.5735	-11.3372	-4.75297	-6.51804
Ppam307	Pon	14.5017	-27.26	-14.887	-4.35789	2.69948
PPam309	Pon	12.4026	-16.3886			2.79473
Ppaf310	Pon	2.02862	-28.7978	-20.4398	-4.41382	-5.5331
Ppaf312	Pon	11.2065	-21.8914	-12.5032	-3.1296	0.362575
Ppaf313	Pon	10.2105	-14.3257	-15.0154	-4.55199	0.275777
PPaf315	Pon	10.8312	-34.7828	-17.0128	3.0302	3.99974
Pppf322	Pon	14.3558	-18.9524	-13.0343	3.49207	-0.390453
Pppm324	Pon	26.5988	-10.4317	-4.17174	13.3351	10.3192
Pppf326	Pon	19.8787	-17.7431	-7.32374	4.18964	8.83647
Pppm327	Pon	21.9857	-0.400971	1.53038	12.6824	11.1492
Pppm328	Pon	38.7832	-32.1198	-12.273	0.916015	10.5901
Pppf329	Pon	18.529	-22.3782	-10.9473	3.97285	4.99129
Pppm330	Pon	11.3408	-20.4451	8.30568	15.5561	17.3928
Pppm331	Pon	19.1111	-13.0883	-17.6786	1.91684	11.5607
Pppf332	Pon	7.94662	-5.59677	-1.2134	1.21082	2.32156
Pppf336	Pon	6.71376	-19.8782	-14.9974	1.91804
Pppf337	Pon	17.5945	-13.8744	-5.0192	7.13414	7.97683
Pppm338	Pon	6.27306	-25.2545	-15.856	-5.62409	16.2307
Pppf343	Pon	13.0108	-31.5741	-7.19016	2.1572	9.05349
Ppam344	Pon	15.9089	-0.171757	2.5611	11.8039	5.63803
33316xx	Aus			-23.3313
33389xx	Aus					10.4552
33348xx	Aus		-1.25823
4381xxx	Aus		-14.9636	-22.925
333w-39	Aus	-14.2697
33356xx	Aus				13.3373
33314xx	Aus					-0.319487
333141x	Aus					4.03272
SKW14147						3.97647
Stw64	Aus
SKW2954					3.5398
Stw68	Aus			-11.8196
Stw382	Aus		-8.53744
stw418	Aus	-10.842
SK84		-5.15737
