# Supplementary material for: Metacarpal torsion in apes, humans, and early Australopithecus: implications for manipulatory abilities
Source: PeerJ. 2015 Oct 6;3:e1311. doi: 10.7717/peerj.1311 (PMC4614803; doi:10.7717/peerj.1311)
Supplement: Supplemental Information 2 [file peerj-03-1311-s002.xlsx]

## Sheet: Feuil1
Species	Sex	Gen	3DPT	3PPT	3DPrat	4DML	4PML	4DPrat
H. s. sapiens	m	1	15.4	11.2	1.375	12.7	11.5	1.10435
H. s. sapiens	f	1	14.6	8	1.825	10.8	6.7	1.61194
H. s. sapiens	m	1	14.7	9.1	1.61538	12.3	6.4	1.92188
H. s. sapiens	f	1	13.3	7.7	1.72727	11	8.5	1.29412
H. s. sapiens	m	1	15.2	9.1	1.67033	12.5	6.4	1.95312
H. s. sapiens	m	1	14.2	9.1	1.56044	12.3	8.2	1.5
H. s. sapiens	m	1	15.8	10.5	1.50476	13.6	9.9	1.37374
H. s. sapiens	m	1	15.1	10.3	1.46602	13.2	7	1.88571
H. s. sapiens	m	1	13	7.7	1.68831	11.4	5.8	1.96552
H. s. sapiens	f	1	13.1	6.6	1.98485	11.2	6.4	1.75
H. s. sapiens	f	1	12.7	9.1	1.3956	10.2	7.8	1.30769
H. s. sapiens	m	1	14.4	9.6	1.5	11.5	9.9	1.16162
H. s. sapiens	m	1	15	7.8	1.92308	12.5	7.3	1.71233
H. s. sapiens	f	1	13.5	7.2	1.875	11.4	5.7	2
H. s. sapiens	f	1	13.8	9	1.53333	11.8	8.4	1.40476
H. s. sapiens	f	1	15.3	9.2	1.66304	10	8.4	1.19048
H. s. sapiens	m	1	15.2	9.8	1.55102	14.2	9.1	1.56044
H. s. sapiens	f	1	14.4	8.2	1.7561	11.6	9.2	1.26087
H. s. sapiens	f	1	13.4	8.2	1.63415	11.4	8.1	1.40741
H. s. sapiens	m	1	14.3	10.2	1.40196	13.5	9.1	1.48352
H. s. sapiens	f	1	12.3	9.6	1.28125	9.9	8.4	1.17857
H. s. sapiens	m	1	14.3	9.7	1.47423	11.7	8.7	1.34483
H. s. sapiens	m	1	15.2	8.3	1.83133	12.6	7.2	1.75
H. s. sapiens	m	1	14.8	9.8	1.5102	11.5	6.2	1.85484
H. s. sapiens	m	1	15.9	11.8	1.34746	13	8.9	1.46067
H. s. sapiens	f	1	12.5	7.1	1.76056	10.7	5	2.14
H. s. sapiens	f	1	12	7.1	1.69014	9.7	4.8	2.02083
H. s. sapiens	f	1	14	8.2	1.70732	11.4	7.5	1.52
H. s. sapiens	f	1	12.1	6.6	1.83333	9.6	5.3	1.81132
P. troglodytes	m	2	12.8	9.7	1.31959	9.9	8	1.2375
P. troglodytes	f	2	13	10.5	1.2381	10.2	8	1.275
P. troglodytes	f	2	11.8	8.6	1.37209	7.8	6.5	1.2
P. troglodytes	f	2	11.8	9	1.31111	8.9	8.3	1.07229
P. troglodytes	m	2	14.6	12	1.21667	12.6	8.1	1.55556
P. troglodytes	m	2	17.9	10.4	1.72115	10.3	10.1	1.0198
P. troglodytes	f	2	14.4	8.9	1.61798	12.8	9.1	1.40659
P. troglodytes	m	2	13.9	11.3	1.23009	11.9	8.7	1.36782
P. troglodytes	f	2	13.4	10.4	1.28846	10.2	8.2	1.2439
P. troglodytes	f	2	13.2	9.4	1.40426	9	9	1
P. troglodytes	m	2	13.6	10.4	1.30769	10.5	8.8	1.19318
P. troglodytes	m	2	14.3	12.6	1.13492	10.4	10.2	1.01961
P. troglodytes	m	2	12	10.4	1.15385	10.2	8.5	1.2
P. troglodytes	m	2	15.2	10.1	1.50495	9.4	8.5	1.10588
P. troglodytes	f	2	11.6	9	1.28889	8.3	8.5	0.976471
P. troglodytes	f	2	13.1	9.8	1.33673	8.1	7.7	1.05195
P. troglodytes	m	2	13.8	10.6	1.30189	11.7	9.3	1.25806
P. troglodytes	f	2	12.2	10.7	1.14019	9.4	9.4	1
P. troglodytes	f	2	12.5	8.7	1.43678	8.9	7.6	1.17105
P. troglodytes	m	2	13.1	10.2	1.28431	11.6	8.4	1.38095
P. troglodytes	f	2	12.7	10.4	1.22115	8.5	8.3	1.0241
P. troglodytes	m	2	14.1	10.5	1.34286	10.6	8.2	1.29268
P. troglodytes	m	2	13.1	9.8	1.33673	9.7	7.4	1.31081
P. troglodytes	f	2	12.8	8.8	1.45455	9.9	7.8	1.26923
P. troglodytes	f	2	12.1	9.2	1.31522	9	8	1.125
P. troglodytes	f	2	12	9.5	1.26316	10	8.4	1.19048
P. troglodytes	m	2	11.9	10	1.19	9.2	8.6	1.06977
P. troglodytes	f	2	12.25	11.23	1.09083	9.07	7.6	1.19342
P. troglodytes	f	2	12.19	8.7	1.40115	10.69	6.85	1.56058
P. troglodytes	f	2	12.81	9.82	1.30448	9.77	7.91	1.23515
P. troglodytes	m	2	13.66	10.58	1.29112	10.63	9.25	1.14919
P. troglodytes	f	2	11.69	8.93	1.30907	9.46	8.33	1.13565
P. troglodytes	f	2	12.72	9.69	1.31269	9.88	8.61	1.1475
P. troglodytes	f	2	12.48	9.95	1.25427	8.97	8.38	1.07041
P. troglodytes	f	2	13.2	9.08	1.45374	10.72	8.79	1.21957
P. troglodytes	f	2	11.59	8.42	1.37648	10.88	7.73	1.4075
G. g. gorilla	m	3	19.4	12.4	1.56452	15.1	10.5	1.4381
G. g. gorilla	f	3	14	10.6	1.32075	12.2	9.9	1.23232
G. g. gorilla	f	3	14.7	10.5	1.4	11.5	8.4	1.36905
G. g. gorilla	m	3	16.9	14.1	1.19858
G. g. gorilla	m	3	17.2	12.6	1.36508	15.7	10	1.57
G. g. gorilla	m	3	21.4	13.9	1.53957	16.8	13.3	1.26316
G. g. gorilla	m	3				18.6	10.9	1.70642
G. g. gorilla	m	3	16.6	13.2	1.25758	14.8	9.8	1.5102
G. g. gorilla	f	3	13.6	9.9	1.37374	12.1	8	1.5125
G. g. gorilla	f	3	13.2	10.7	1.23364	13.3	8.5	1.56471
G. g. gorilla	f	3	14.5	10.5	1.38095	11.3	8.9	1.26966
G. g. gorilla	f	3	14.7	12.3	1.19512	12.1	10	1.21
G. g. gorilla	f	3	15.5	12.2	1.27049	11.6	8.9	1.30337
G. g. gorilla	f	3	15.4	12	1.28333	12.1	7.4	1.63514
G. g. gorilla	f	3	15.4	12.1	1.27273	12.5	9.9	1.26263
G. g. gorilla	m	3	16.2	13.7	1.18248	17.5	10.7	1.63551
G. g. gorilla	m	3	18	15	1.2	17.2	8.9	1.93258
G. g. gorilla	m	3	16.7	13.1	1.27481	15.1	11	1.37273
G. g. gorilla	m	3	16.9	13.1	1.29008	16.8	10.7	1.57009
G. g. gorilla	f	3	15.7	11.53	1.36167	13.72	10.68	1.28464
G. g. gorilla	m	3	18.92	14.56	1.29945	16.78	13.44	1.24851
G. g. gorilla	m	3	18.65	14.38	1.29694	16.21	13.88	1.16787
G. g. gorilla	m	3	18.01	14.3	1.25944	18.27	9.57	1.90909
G. g. gorilla	f	3	13.77	10.43	1.32023	11.03	8.96	1.23103
G. g. gorilla	m	3	21.25	12.88	1.64984	16.67	12.32	1.35308
G. g. gorilla	m	3	17.79	12.85	1.38444	17.36	9.47	1.83316
G. g. gorilla	f	3	14.73	9.58	1.53758	12.86	8.45	1.52189
G. g. gorilla	m	3	18.89	13.67	1.38186	16.25	13.08	1.24235
G. g. gorilla	m	3	18.84	13.05	1.44368	19.15	12.81	1.49493
G. g. gorilla	m	3	20.14	14.6	1.37945	17.34	13.88	1.24928
G. g. gorilla	m	3	18.66	14.38	1.29764	15.88	10.9	1.45688
G. g. gorilla	f	3	14.74	9.58	1.53862	12.75	10.65	1.19718
G. g. gorilla	m	3	18.74	15.06	1.24436	14.45	11.44	1.26311
G. g. gorilla	f	3	13.5	9.89	1.36502	11.63	9.89	1.17594
G. g. gorilla	m	3	18.99	14.21	1.33638	15.99	12.37	1.29264
G. g. gorilla	m	3	17.96	12.32	1.45779	15.04	10.8	1.39259
P. pygmaeus	f	4	11.7	10	1.17	8.7	8.2	1.06098
P. pygmaeus	f	4	12.6	10	1.26
P. pygmaeus	f	4	10.5	8.2	1.28049	7.2	6.4	1.125
P. pygmaeus	m	4				11.3	9.7	1.16495
P. pygmaeus	m	4	12.2	12.4	0.983871	12.4	9.7	1.27835
P. pygmaeus	f	4	11.6	8.8	1.31818	8.7	7.5	1.16
P. pygmaeus	m	4	13.23	9.47	1.39704	8.13	9.09	0.894389
P. pygmaeus	f	4	10.6	8	1.325	8.7	7.5	1.16
P. pygmaeus	m	4	14.7	12.77	1.15114	11.31	10.57	1.07001
P. pygmaeus	f	4	13.3	10.1	1.31683	8.3	8.6	0.965116
P. pygmaeus	m	4	15.6	12.1	1.28926	11.9	11.8	1.00847
P. pygmaeus	f	4	10	11.9	0.840336	9	7	1.28571
P. pygmaeus	f	4	11.3	9.5	1.18947	8.4	7.6	1.10526
P. pygmaeus	m	4	16.09	12.29	1.30919	12.15	11.23	1.08192
P. pygmaeus	m	4	15.6	11.2	1.39286	11.5	10.3	1.1165
P. pygmaeus	f	4	12.84	9.77	1.31423	10.1	9.2	1.09783
P. pygmaeus	f	4	12.44	11.65	1.06781	9.76	8.94	1.09172
P. pygmaeus	f	4	12.3	9	1.36667	9.4	9	1.04444
P. pygmaeus	m	4	15.5	11	1.40909	12.2	9.7	1.25773
P. pygmaeus	f	4	10.5	9.4	1.11702	8.8	8.2	1.07317
P. pygmaeus	f	4	10.6	8.5	1.24706	8.5	8.1	1.04938
P. pygmaeus	f	4	11.8	8.2	1.43902	9.1	9.8	0.928571
P. pygmaeus	f	4	12.1	8.8	1.375	8.26	8.65	0.954913
P. pygmaeus	m	4	14	12.5	1.12	11.7	11	1.06364
P. pygmaeus	m	4	14.1	10.9	1.29358	9.7	9.6	1.01042
P. pygmaeus	m	4	14.4	11	1.30909	11	10.7	1.02804
P. pygmaeus	f	4	10.4	9	1.15556	9.3	8	1.1625
P. pygmaeus	f	4	12.5	9.3	1.34409	8.6	7	1.22857
P. pygmaeus	f	4	11.8	9	1.31111	9.9	8	1.2375
P. pygmaeus	m	4	14.56	9.74	1.49487	11.73	10.47	1.12034
P. pygmaeus	f	4	13.02	9.39	1.38658	8.47	8.36	1.01316
P. pygmaeus	m	4	14	11.24	1.24555	9.58	9.62	0.995842
P. pygmaeus	f	4	12.48	10.56	1.18182	9.86	9.11	1.08233
P. pygmaeus	f	4	12.93	8.67	1.49135	9.74	8.29	1.17491
P. pygmaeus	i	4	12.88	9.96	1.29317	8.88	8.72	1.01835
P. pygmaeus	m	4	13.78	9.67	1.42503	11.24	10.07	1.11619
P. pygmaeus	f	4	10.73	8.87	1.2097	7.92	7.66	1.03394
P. pygmaeus	m	4	17.46	13.56	1.28761	13.19	10.99	1.20018
AL 438-1		5	13.3	6.6	2.01515
AL 333-153		5	11.7	7.5	1.56
AL 333w-6		5	12.9	6.2	2.08065
AL 333-65		5	11.5	7.5	1.53333
AL 333-16		5	11	7.1	1.5493
AL 333-56		5				10.75	7.36	1.4606
Stw64		6	12.5	8.76	1.42694
Stw65		6				10.57	9.03	1.17054
Stw68		6	12.3	8.37	1.46953
Stw330		6				10.5	6.2	1.3
SKX 2954		7				9.73	7.42	1.3
SKX 3646		7	12.55	8.27	1.51753
